# Supplementary material for: North-South disparities in English mortality1965–2015: longitudinal population study
Source: PubMed Central journal article supplement (PMC5561382; doi:10.1136/jech-2017-209195), 2017-08-07
Supplement: jech-2017-209195supp001.pdf [file jech-2017-209195supp001.pdf]

Figure A1: Population age structure differences for the North and South of England for the periods 1965–1973 and 2010–2015.

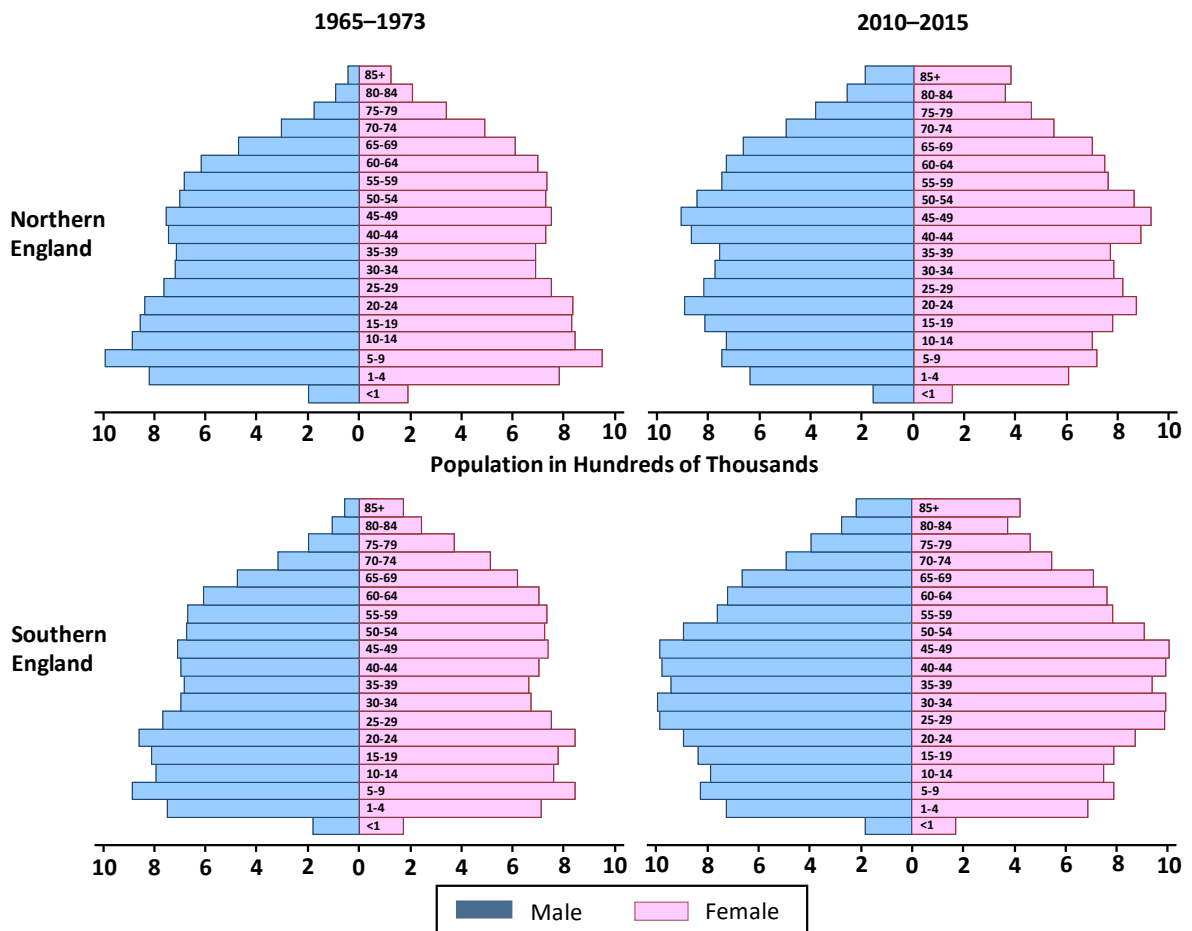

Figure A2: Excess premature (age <75 years) mortality in the North compared with South of England, adjusted for within-year age-sex differences.

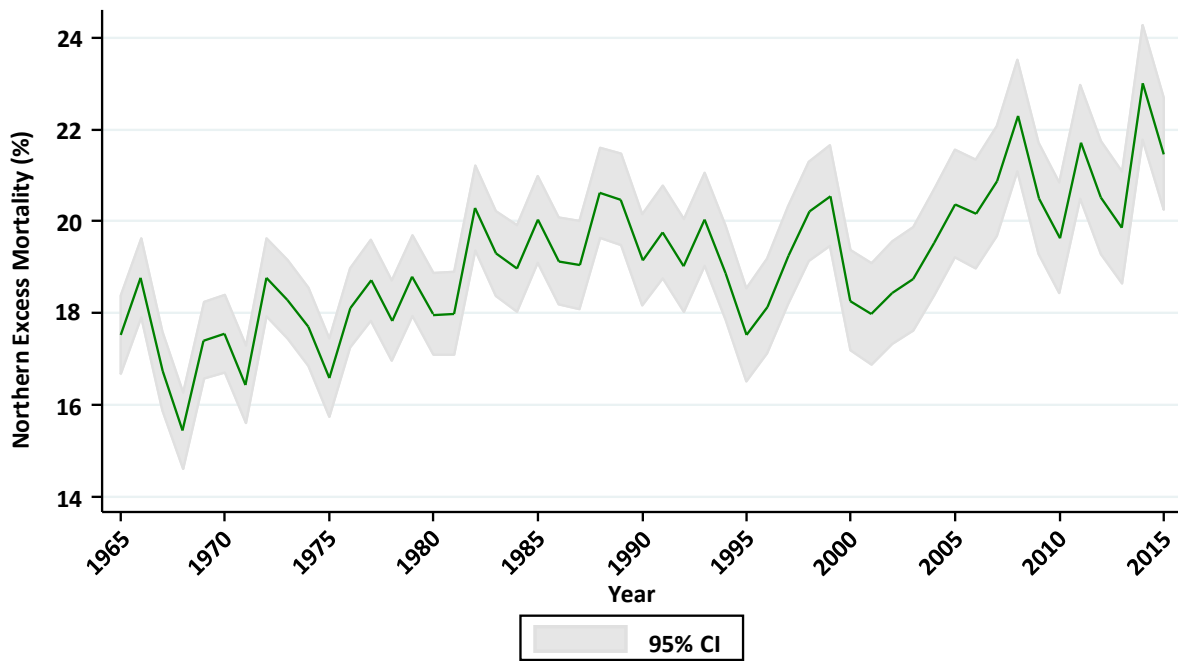

**Table A1: Relative change in northern excess mortality in the year after the recession compared with three years earlier, for the recessions of 1973–75, 1980–81, 1990–91 and 2008–09.**

| <b>Comparison</b> | <b>Estimate (95% CI)</b> |
|-------------------|--------------------------|
| 1976 vs. 1973     | 0.998 (0.987–1.008)      |
| 1982 vs. 1979     | 1.012 (1.001–1.022)      |
| 1992 vs. 1989     | 0.988 (0.977–1.000)      |
| 2010 vs. 2007     | 0.989 (0.975–1.003)      |
